# Supplementary material for: Hypoxia increases genome-wide bivalent epigenetic marking by specific gain of H3K27me3
Source: PubMed Central journal article supplement (PMC5080723; doi:10.1186/s13072-016-0086-0), 2016-10-26

**A**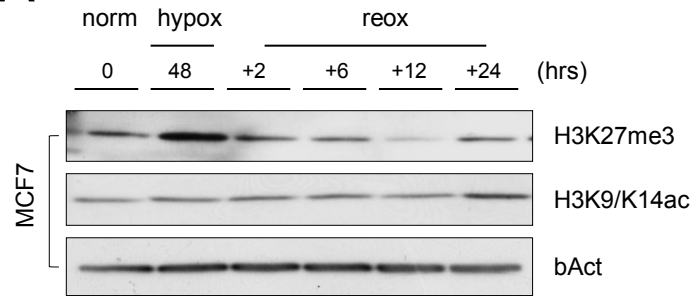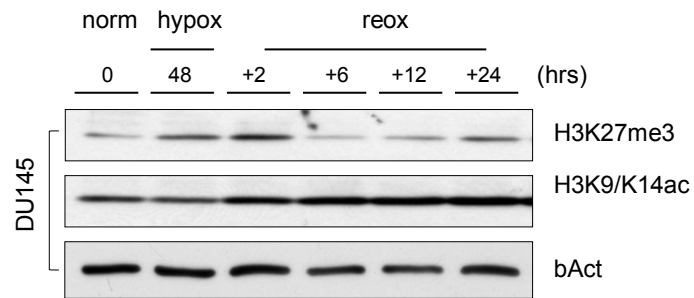**D**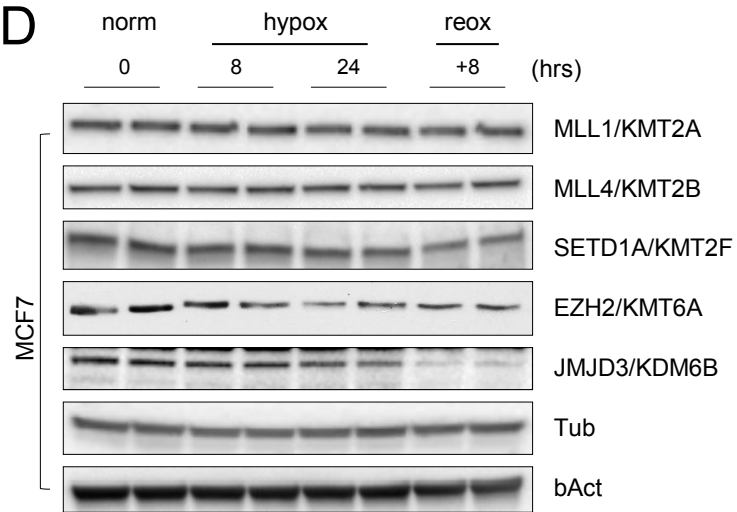**B**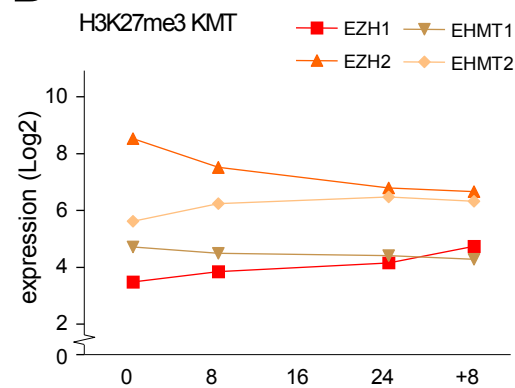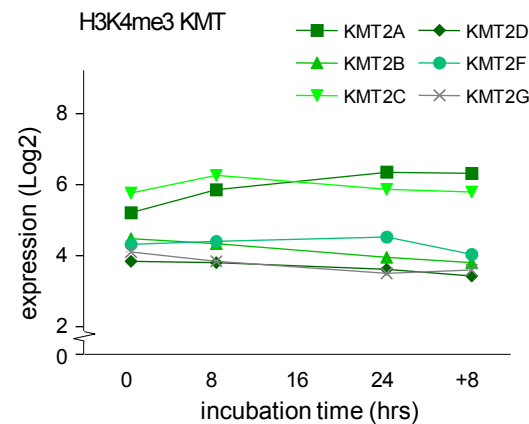**E**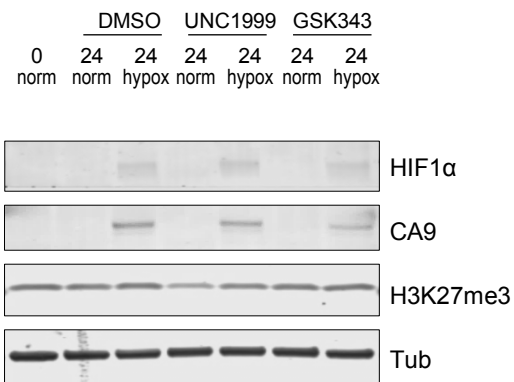**C**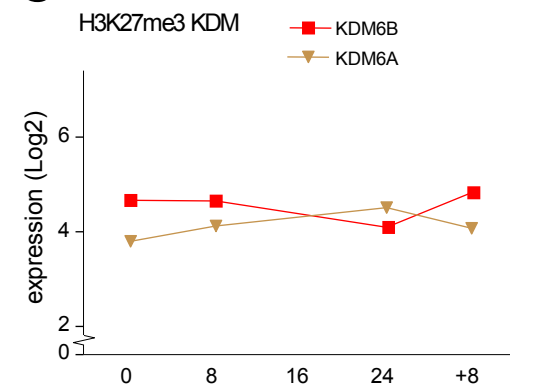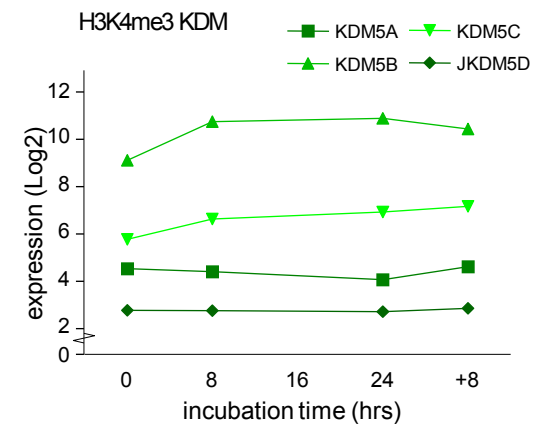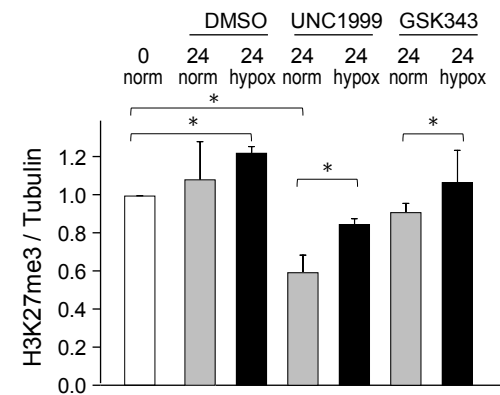

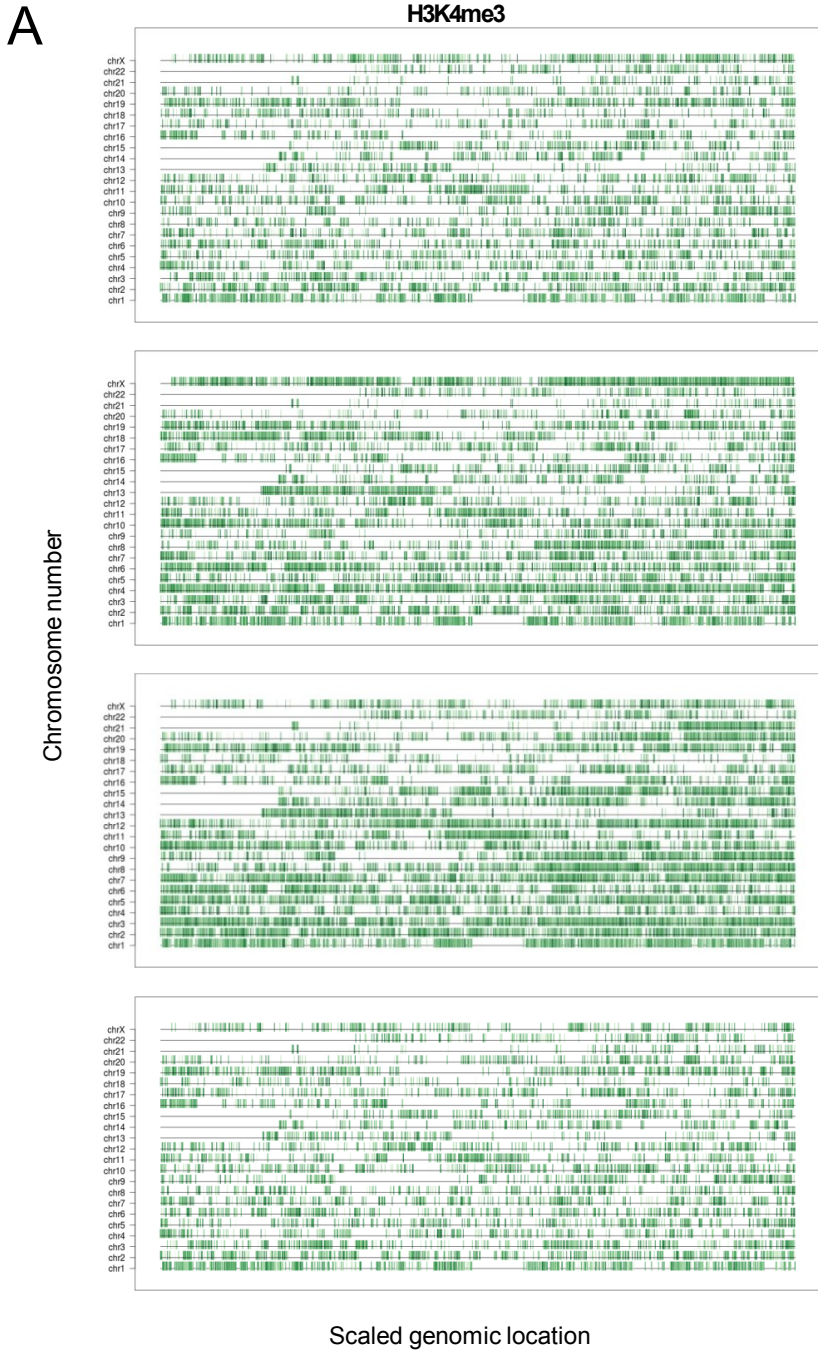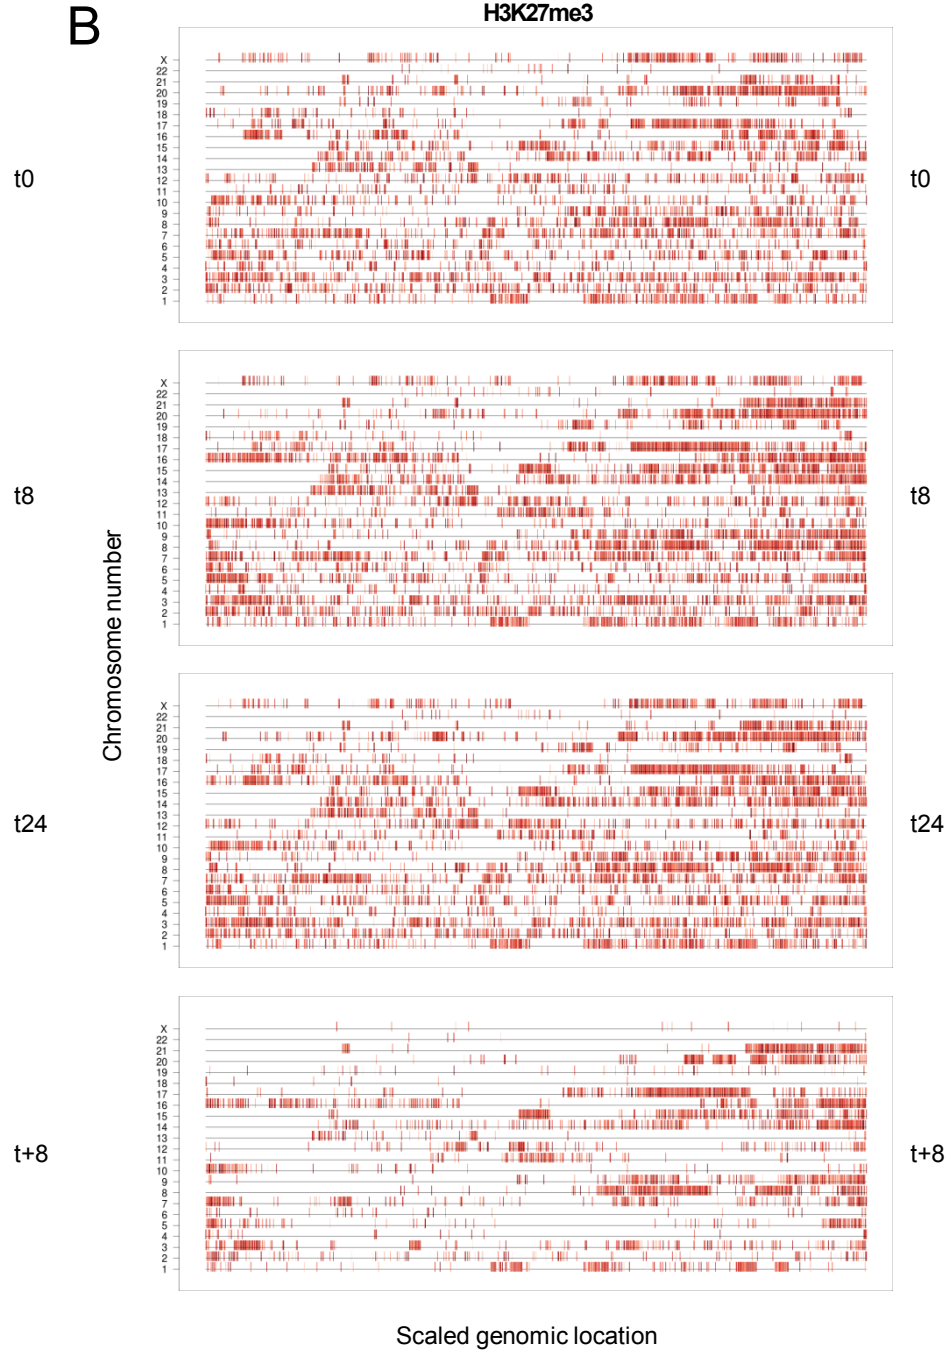



A

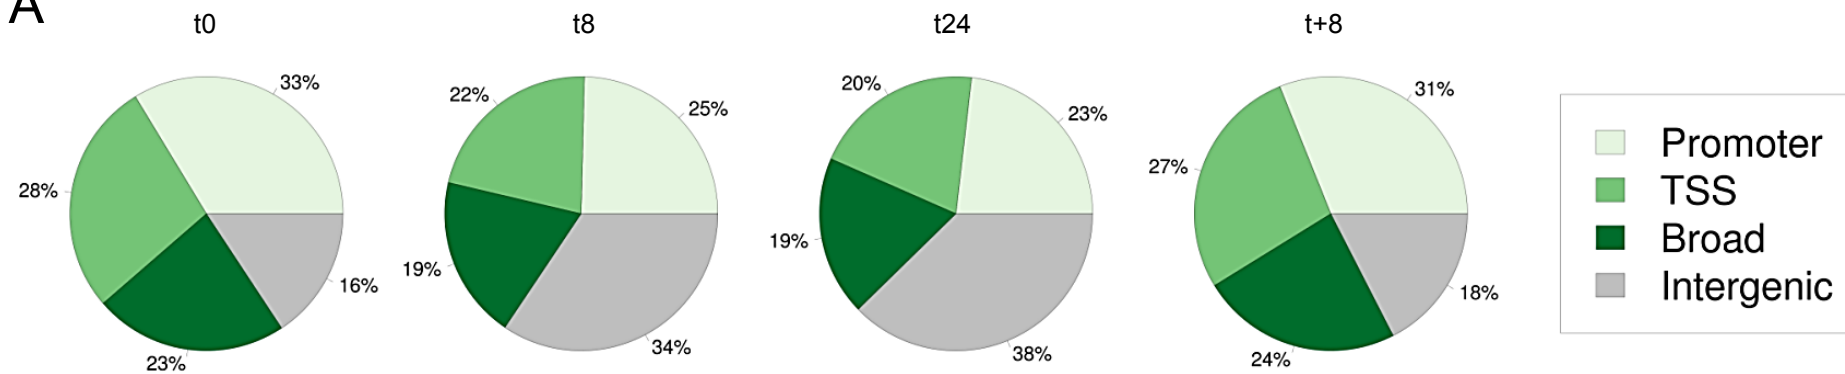

B

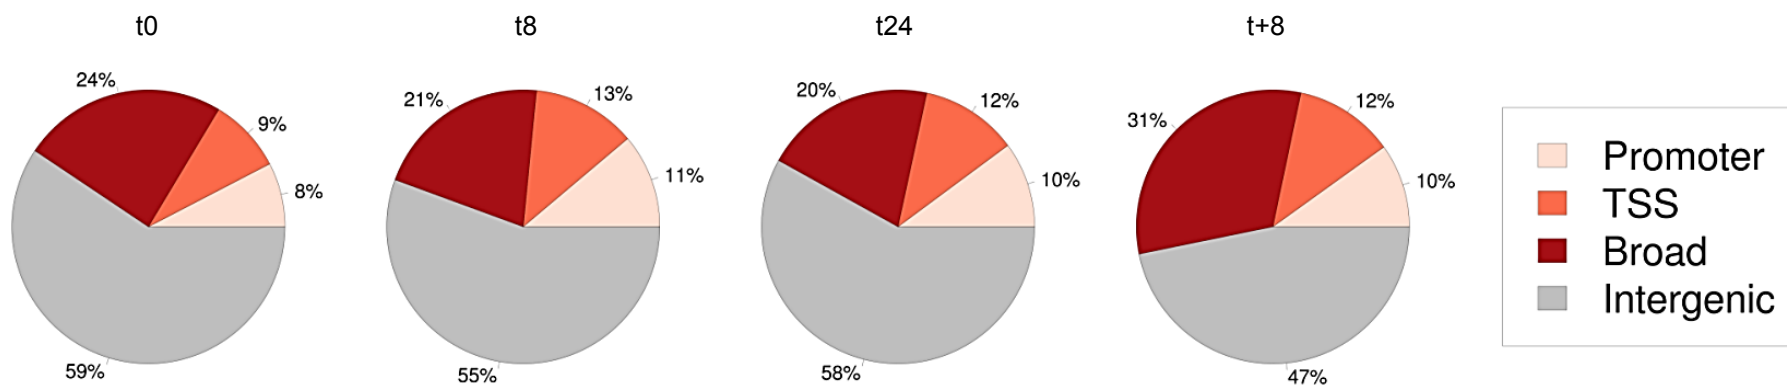

A

|                            | all genes           | HIF1A targets   |
|----------------------------|---------------------|-----------------|
| expressed during hypoxia   | 11% (2544 of 22732) | 30% (58 of 206) |
| upregulated during hypoxia | 43% (325 of 751)    | 97% (39 of 40)  |

B

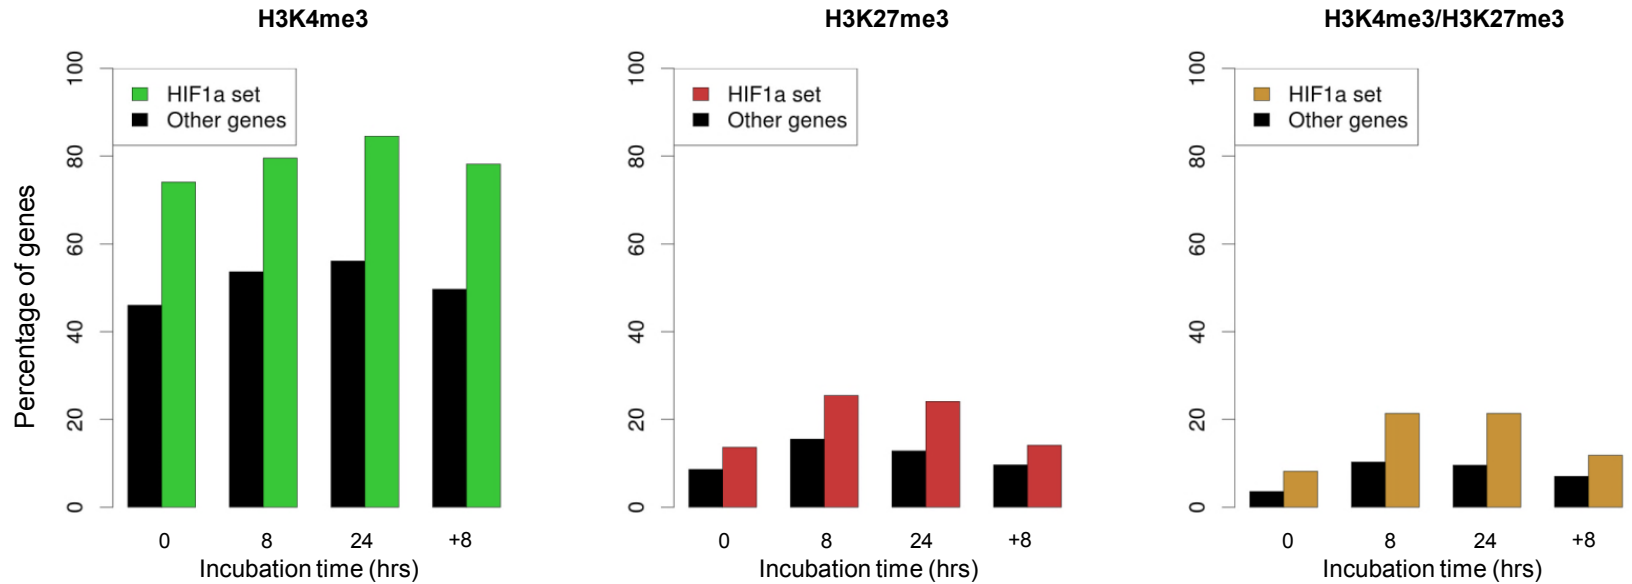

C

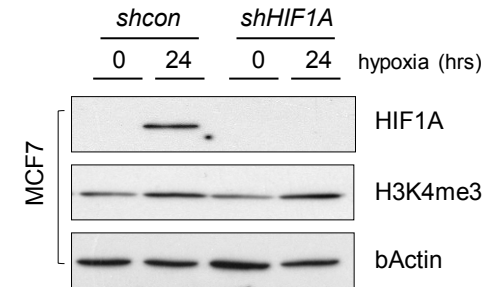

A

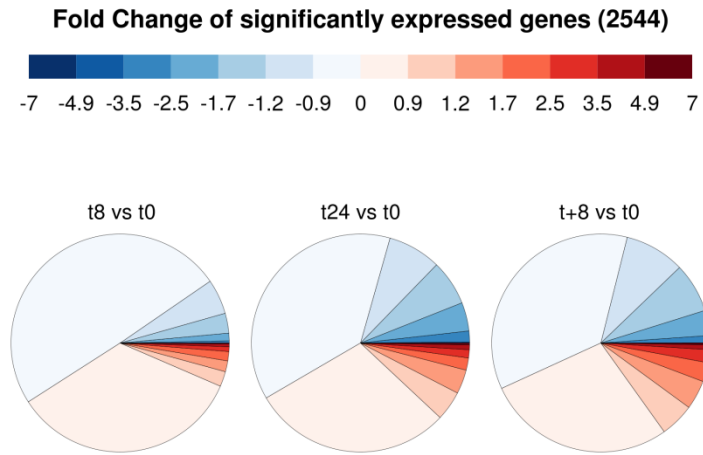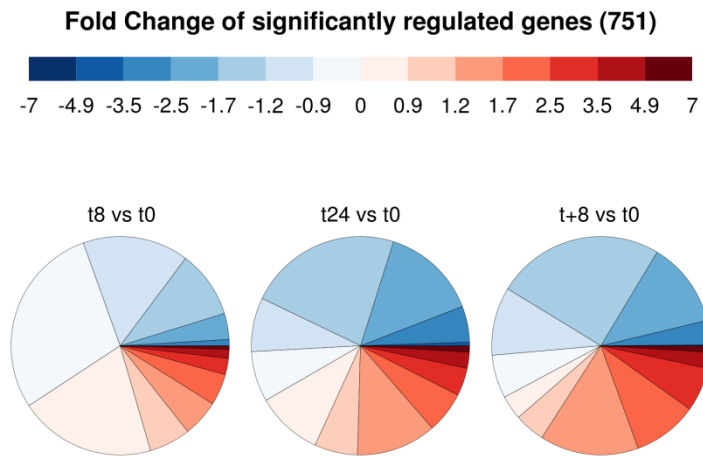

B

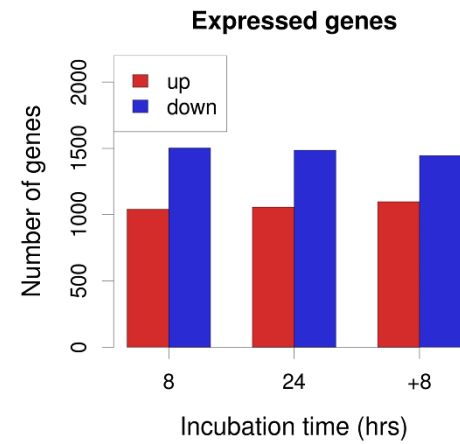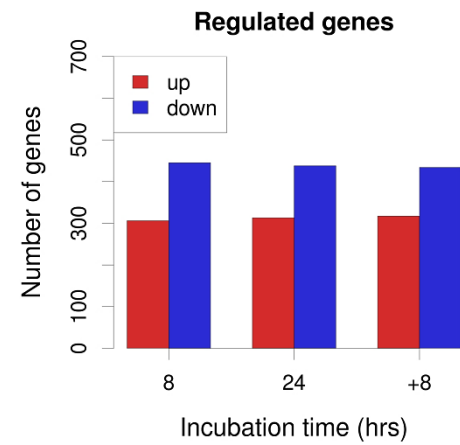

C

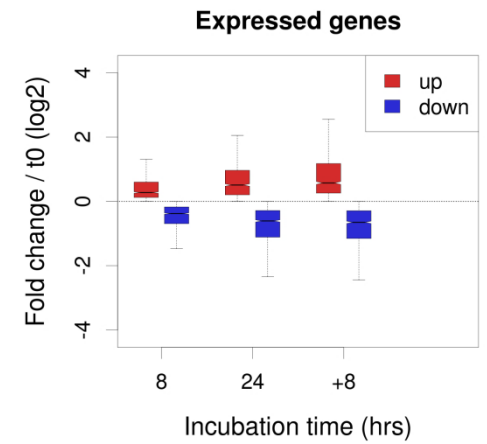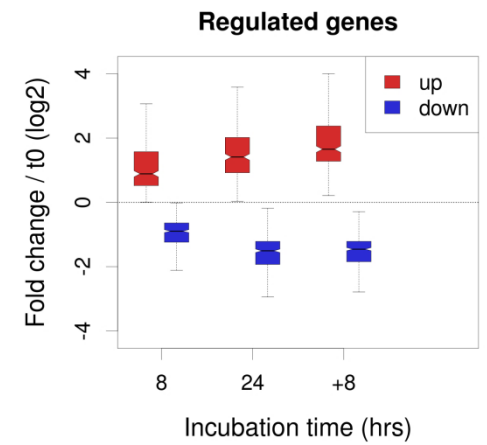

D

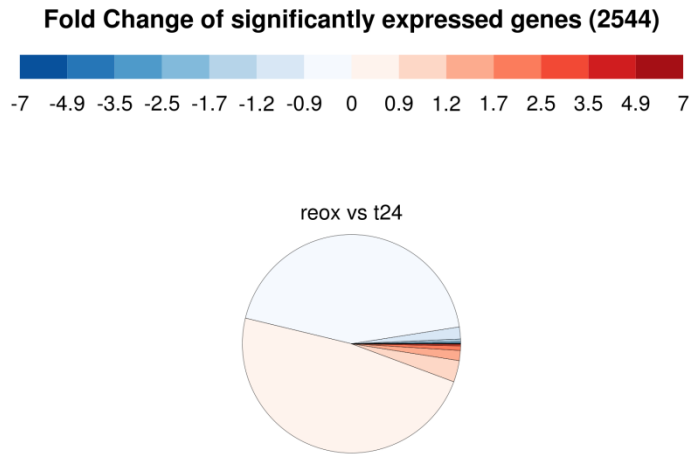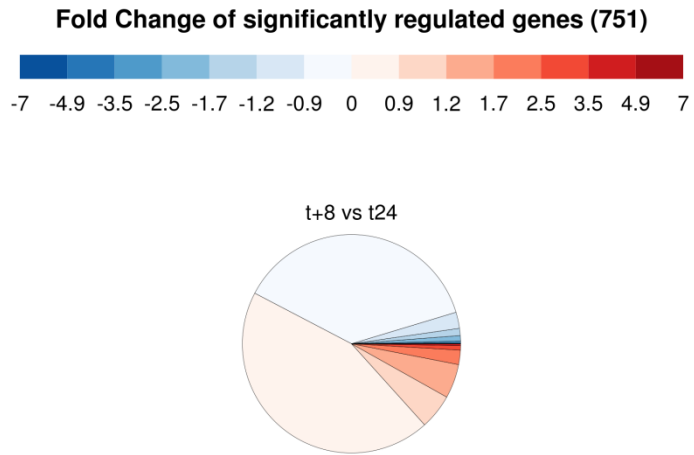

E

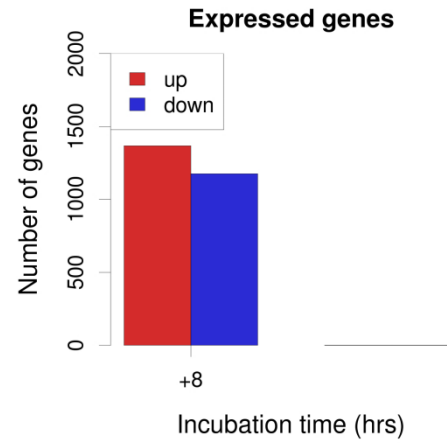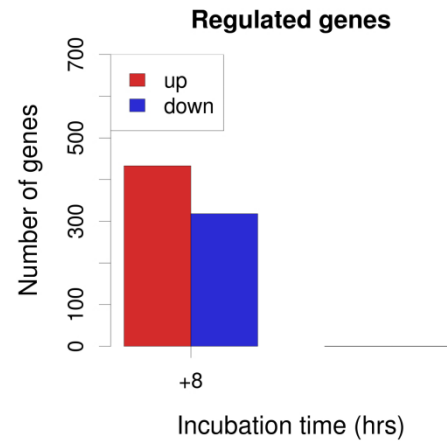

F

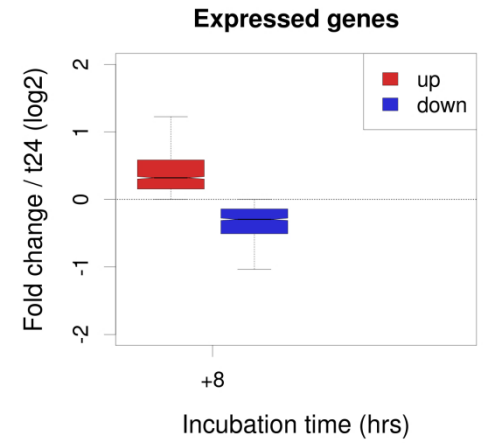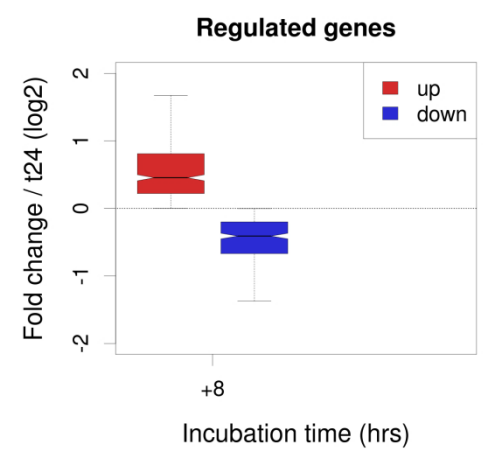

A

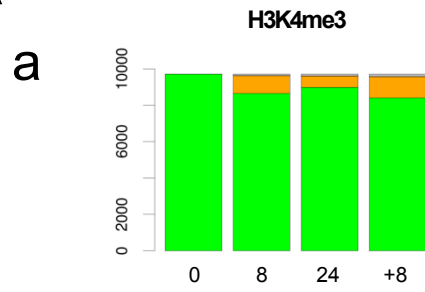

b

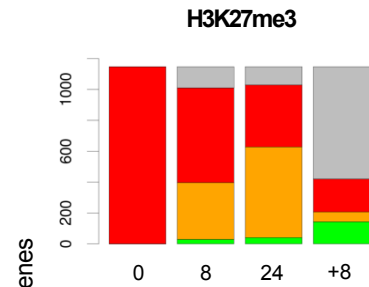

c

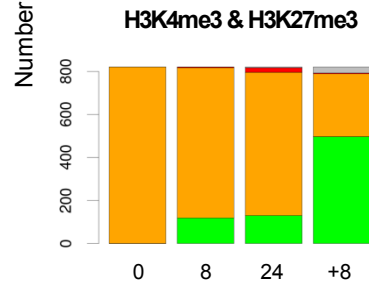

d

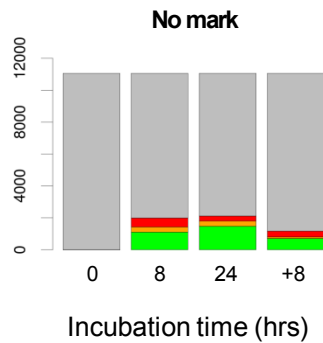

B

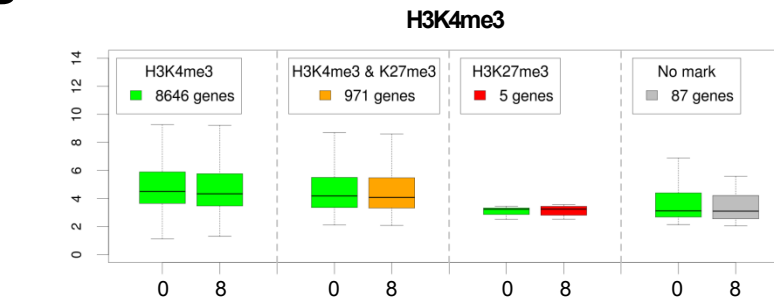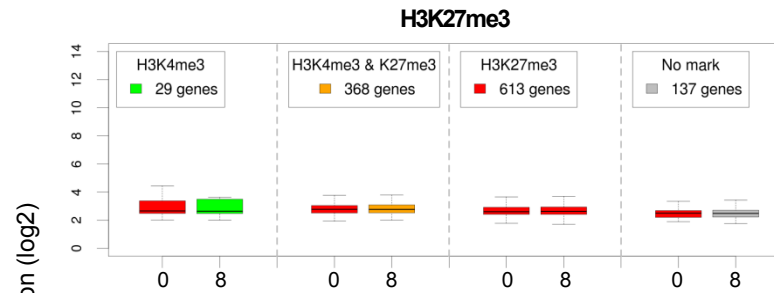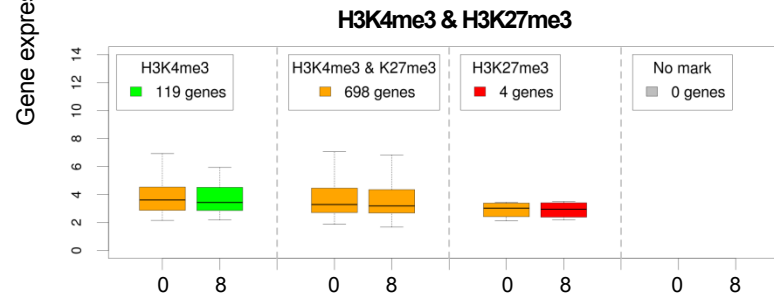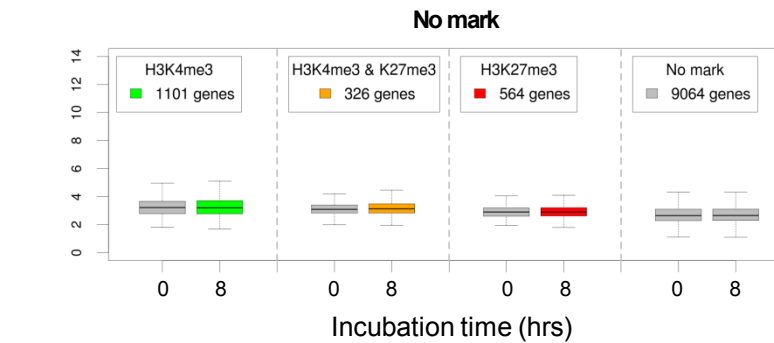



C

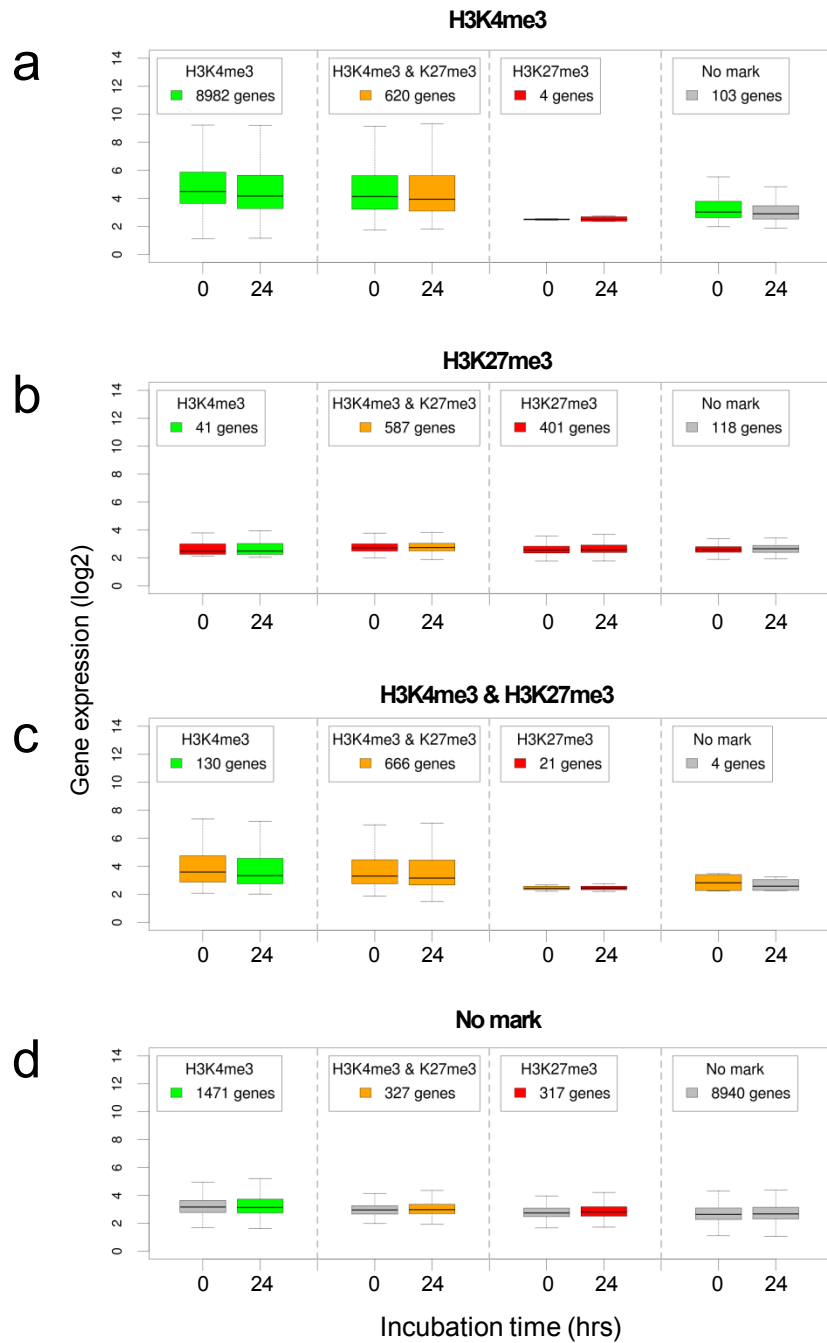

D

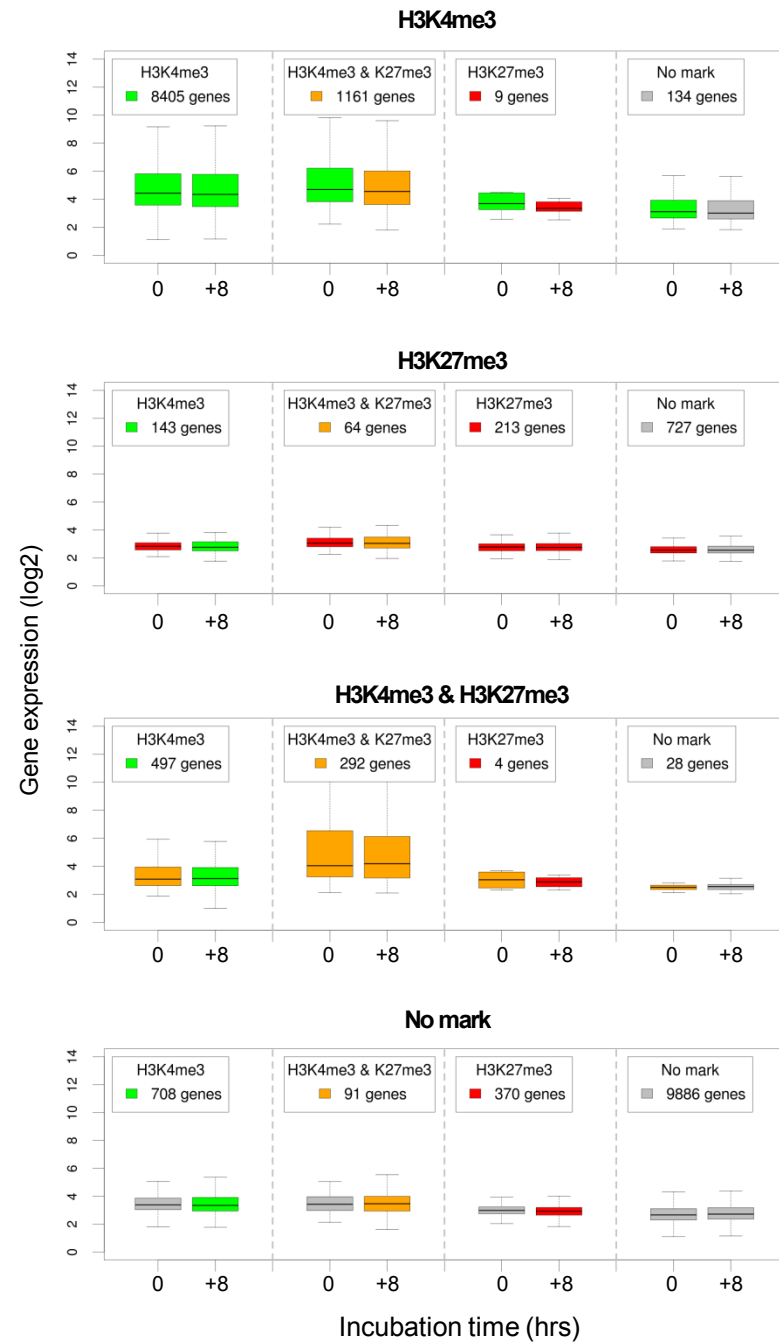

E

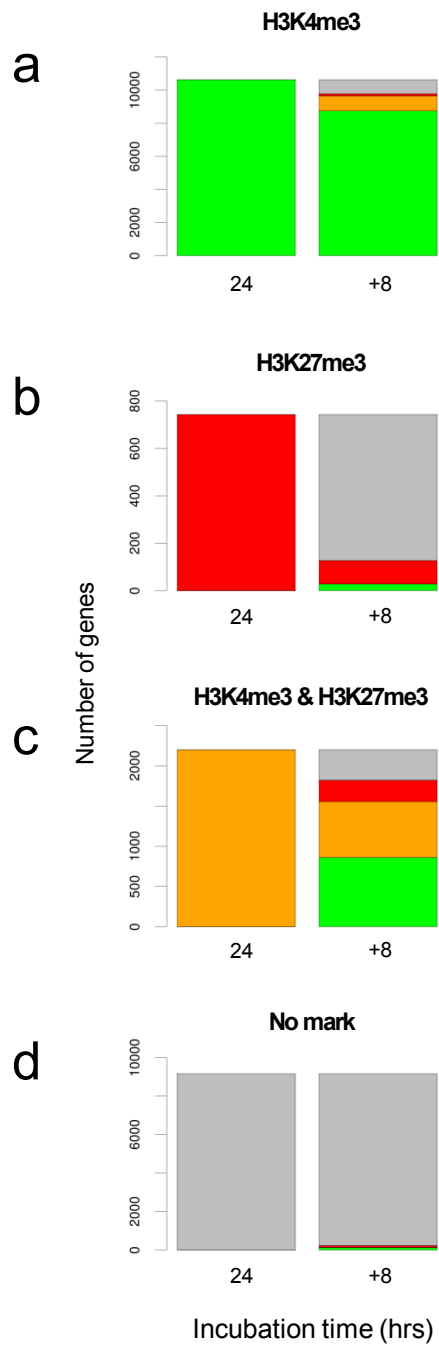

F

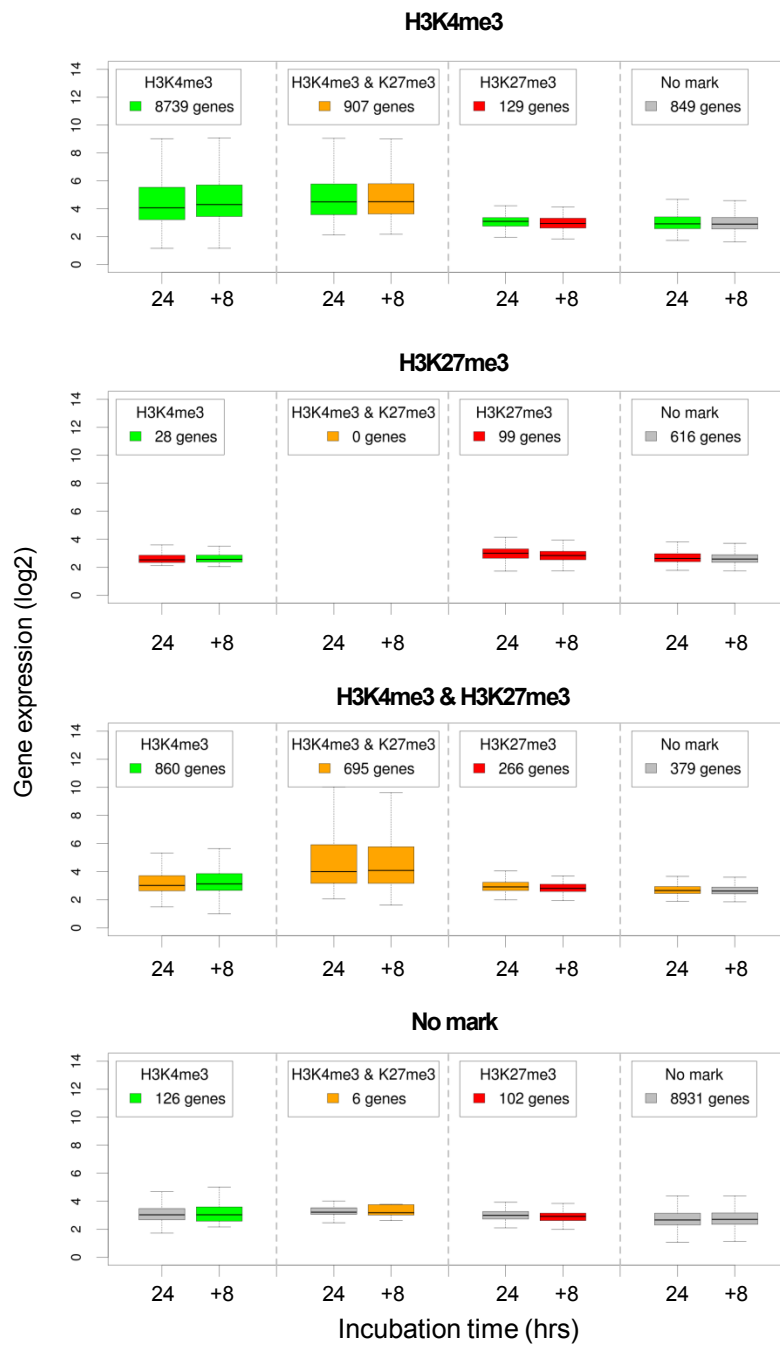

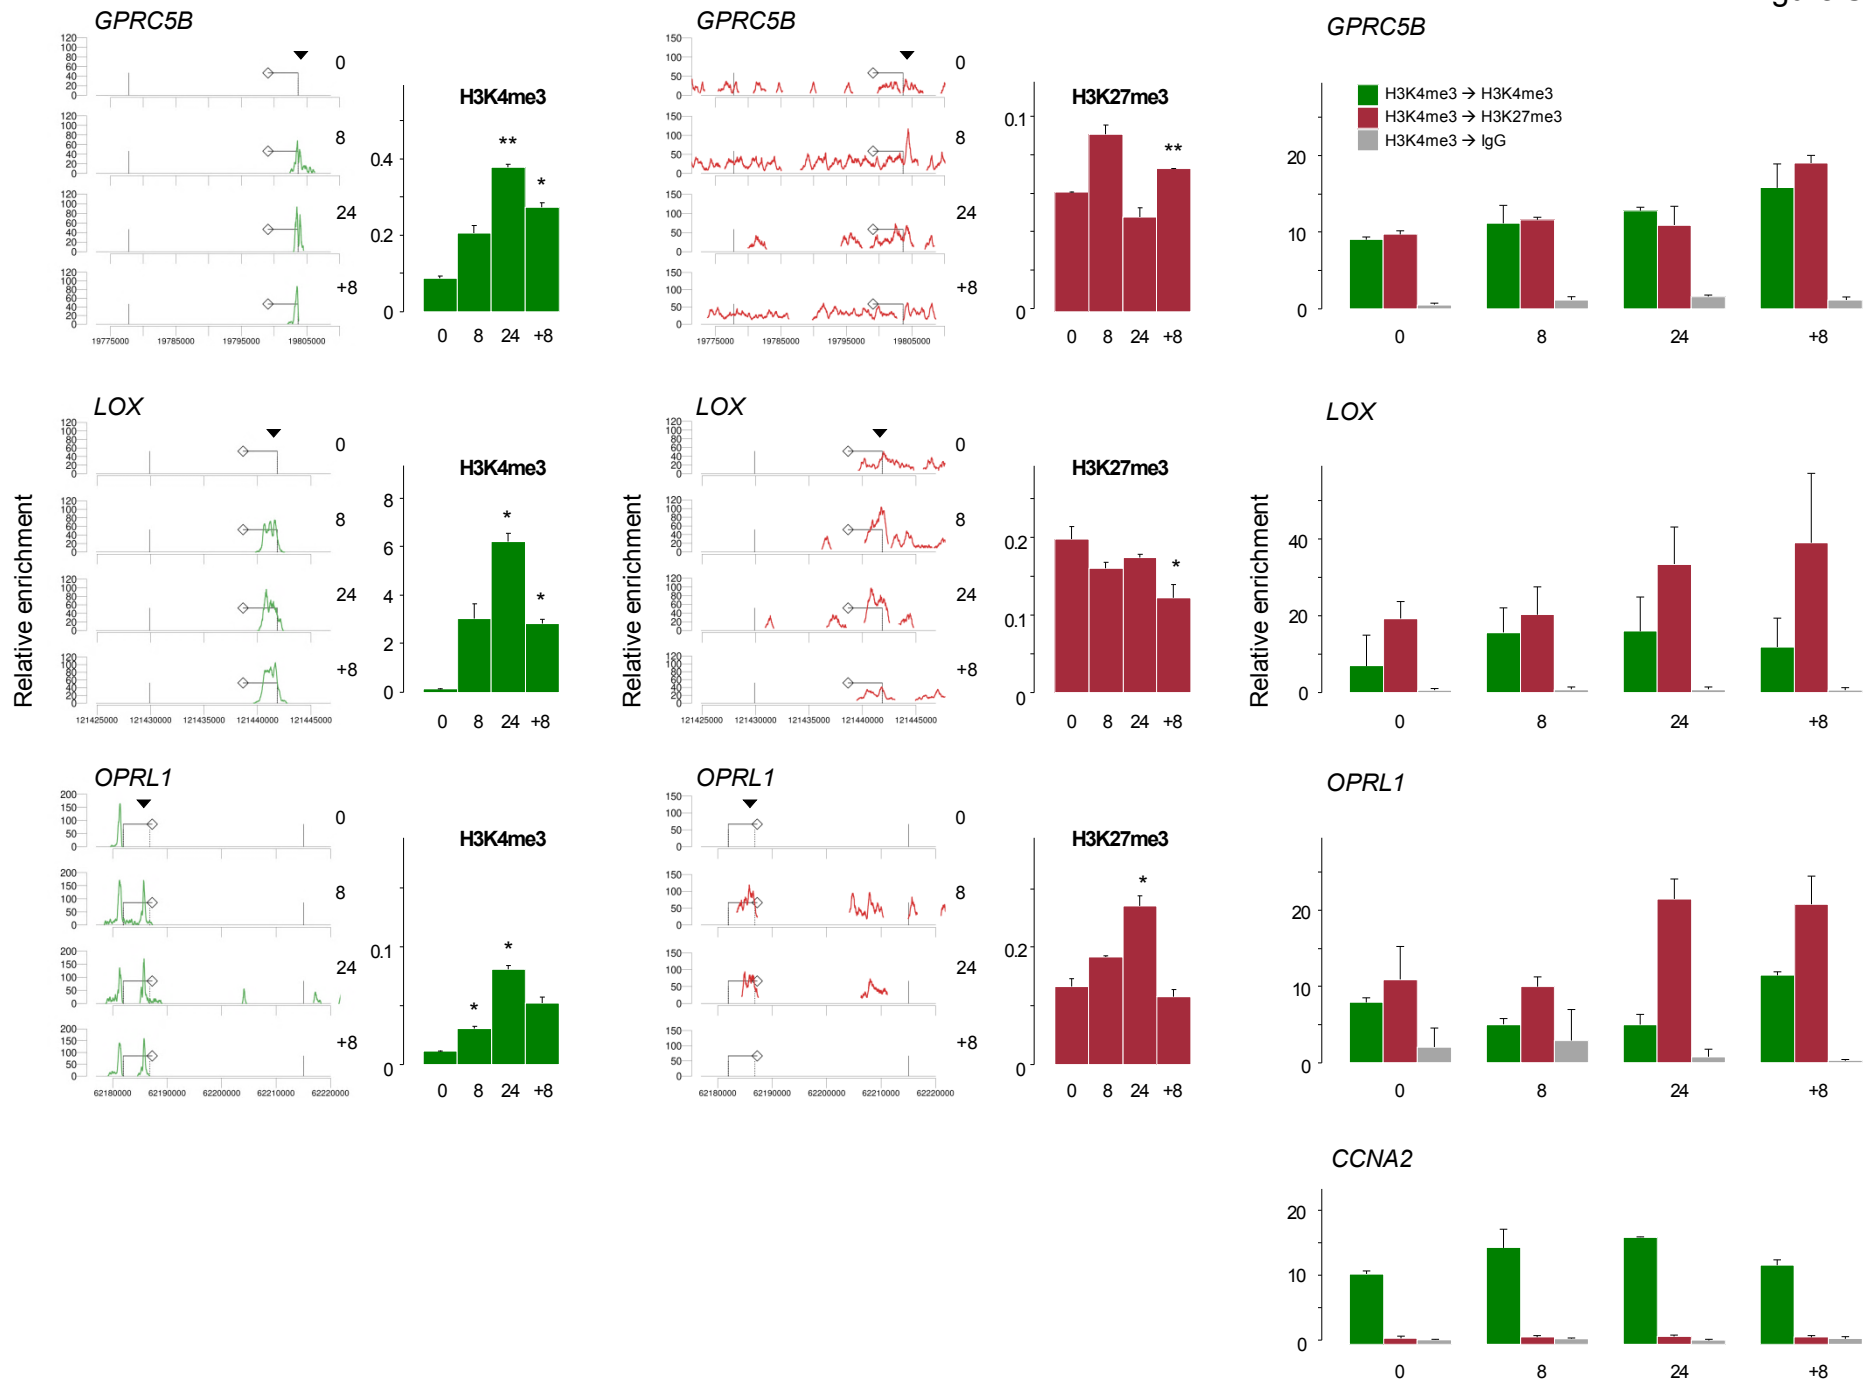

A

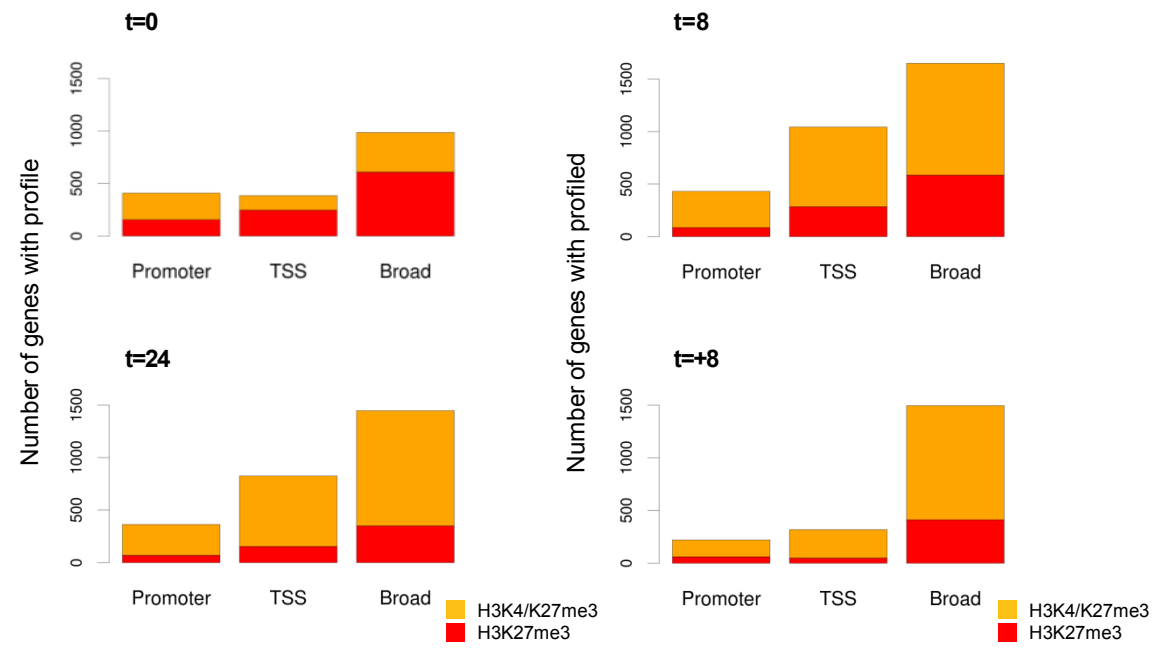

B

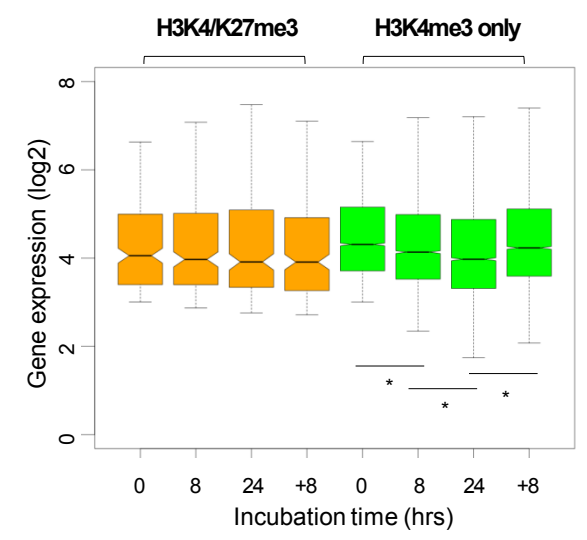

Supplement: 13072_2016_86_MOESM1_ESM.pdf [file 13072_2016_86_MOESM1_ESM.pdf]
